# Supplementary material
Source: publisher figshare collection journal article supplement (https://acs.figshare.com/ndownloader/files/22308459)
Supplement: Supplementary file 1 [file 22308459]

Supporting information for:

Structure determination of Hen Egg-White  
Lysozyme Aggregates adsorbed to  
Lipid/Water and Air/Water Interfaces

S. Strazdaite,<sup>\*,†</sup> E. Navakauskas,<sup>†</sup> J. Kirschner,<sup>‡</sup> T. Sneideris,<sup>¶</sup> and G. Niaura<sup>†</sup>

<sup>†</sup>*Department of Organic Chemistry, Center for Physical Sciences and Technology,  
Sauletekio Ave. 3, Vilnius LT-10257, Lithuania*

<sup>‡</sup>*Institute of solid state physics, Vienna Technical University, Wiedner Hauptstrasse 8-10,  
1040 Vienna, Austria*

<sup>¶</sup>*Institute of Biotechnology, Life Sciences Center, Vilnius University, Sauletekio 7,  
LT-10257 Vilnius, Lithuania*

E-mail: [simona.strazdaite@ftmc.lt](mailto:simona.strazdaite@ftmc.lt)

The supporting information (12 pages in total) contains 3 tables and 10 figures.

# AFM Measurements

Table S1: Information about aggregates determined from AFM images.

| Incubation time | Height and Type of Aggregates |               |            |
|-----------------|-------------------------------|---------------|------------|
|                 | Oligomers                     | Oligomers     | Fibrils    |
| <b>0.5 h</b>    |                               | $\sim 2.5$ nm |            |
| <b>24 h</b>     | 0.8 - 1.5 nm                  | $\sim 2.5$ nm | 1.5 - 3 nm |
| <b>130 h</b>    |                               |               | 1.5 - 4 nm |

## Surface Pressure Data

The surface tension was monitored continuously during VSFG measurements with a commercial KSV NIMA instrument (Biolin Scientific, Sweden) using a platinum rod. Surface pressure ( $\pi$ ) is defined as  $\pi = \gamma_0 - \gamma$ , where  $\gamma_0$  is the surface tension of air/D<sub>2</sub>O and  $\gamma$  is either the surface tension of a DOPG monolayer on the surface, or the surface tension of air/D<sub>2</sub>O with some adsorbates.

Figure S1 A and B show surface pressure data for air/D<sub>2</sub>O and DOPG/D<sub>2</sub>O interfaces after injection of lysozyme sample's aliquots heated for various times. These data were only used for qualitative analysis and to monitor when the whole system reached equilibrium. A quantitative analysis was not possible due to a significant inaccuracy in the equilibrium surface pressure. An example of a lack of reproducibility is given for 130 h aliquot at air/D<sub>2</sub>O surface (with an area between two measurements shaded in light red) is shown in S1 A.

An increase in the surface pressure demonstrates that lysozyme and/or its aggregates were adsorbed to the interface. The shape of the initial increase and the speed depended on the depth at which the aliquot was injected, which was varied within 1 - 5 mm under the visual surface. Only for air/D<sub>2</sub>O interface when 0.5 h heated aliquot was injected, a monotonous decrease in the surface pressure was registered, which most likely appeared due to evaporation of the sample or a drift of the surface tensiometer reading. For other

aliquots surface pressure increased, however, no clear trend could be identified. Surprisingly, at DOPG/D<sub>2</sub>O (initial surface pressure of DOPG/D<sub>2</sub>O was  $\sim 30$  mN/m) approximately the same equilibrium surface pressure value  $\pi_{eq} \simeq 35$  mN/m was reached for all aliquots and even with varying pD. It was shown in a previous study that lysozyme can penetrate phosphatidylglycerol lipid monolayer when surface pressure of the lipid film is up to 20 mN/m. In our case, almost constant  $\pi_{eq}$  suggests that the lipid monolayer is saturated with lysozyme and its aggregates in all cases.

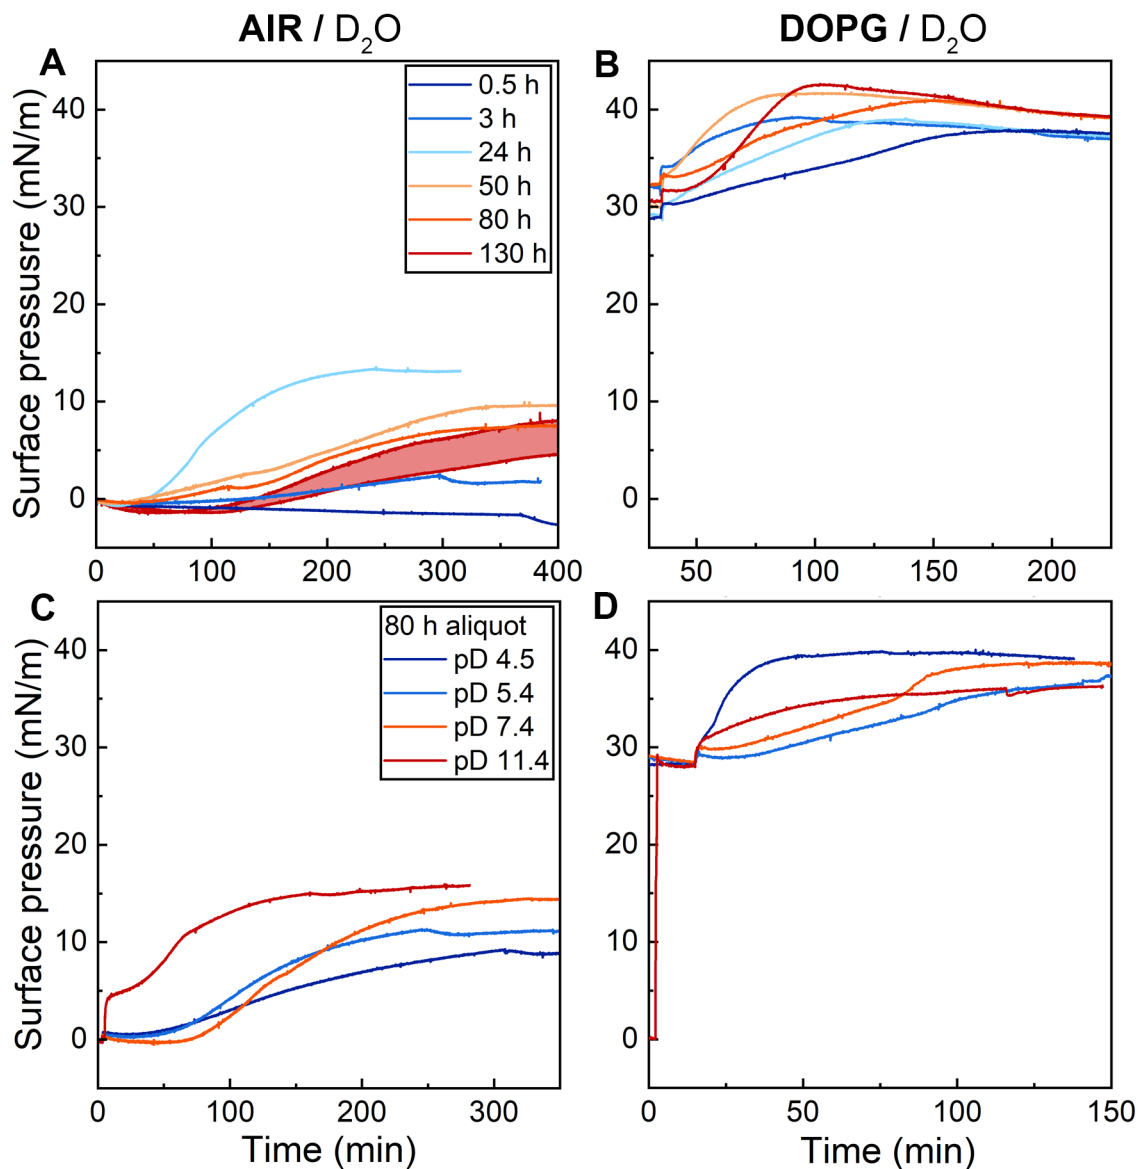

Figure S1: Surface pressure of air/D<sub>2</sub>O (A) and DOPG/D<sub>2</sub>O (B) interfaces during the adsorption of lysozyme aliquots, heated for different times (see legend). Surface pressure at different pD values during the adsorption of 80 h lysozyme aliquot to the air/D<sub>2</sub>O (C) and DOPG/D<sub>2</sub>O (D) interfaces.

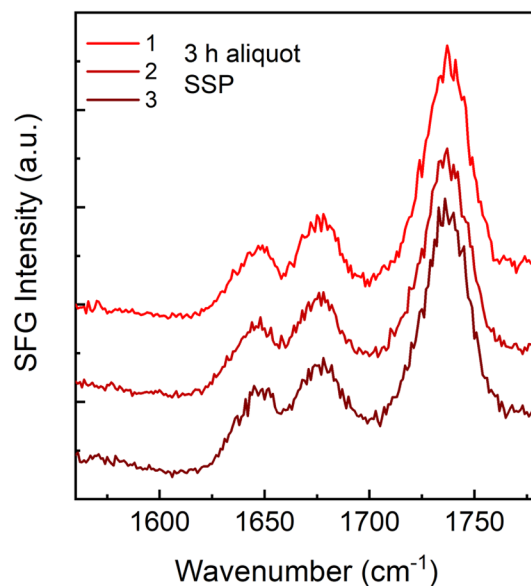

Figure S2: VSFG spectra in SSP polarization of 3 hours heated aliquot adsorbed to the DOPG/D<sub>2</sub>O interface. Each spectrum corresponds to a different experiment (numbered as 1, 2 or 3 in the legend).

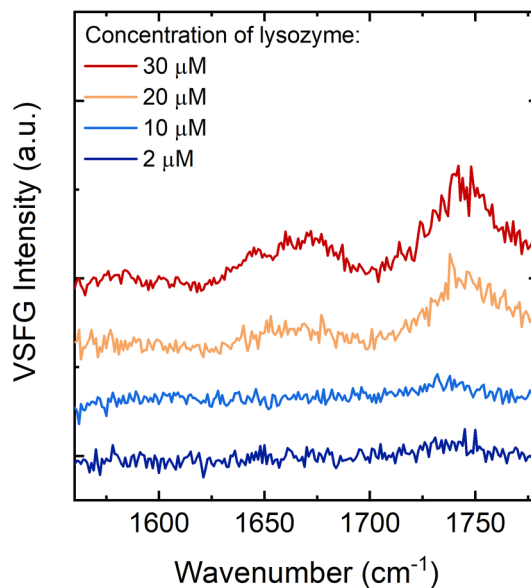

Figure S3: VSFG spectra in SSP polarization combination of 0.5 h aliquot adsorbed to air/D<sub>2</sub>O interface at various bulk concentrations (see legend).

## VSFG spectra comparison

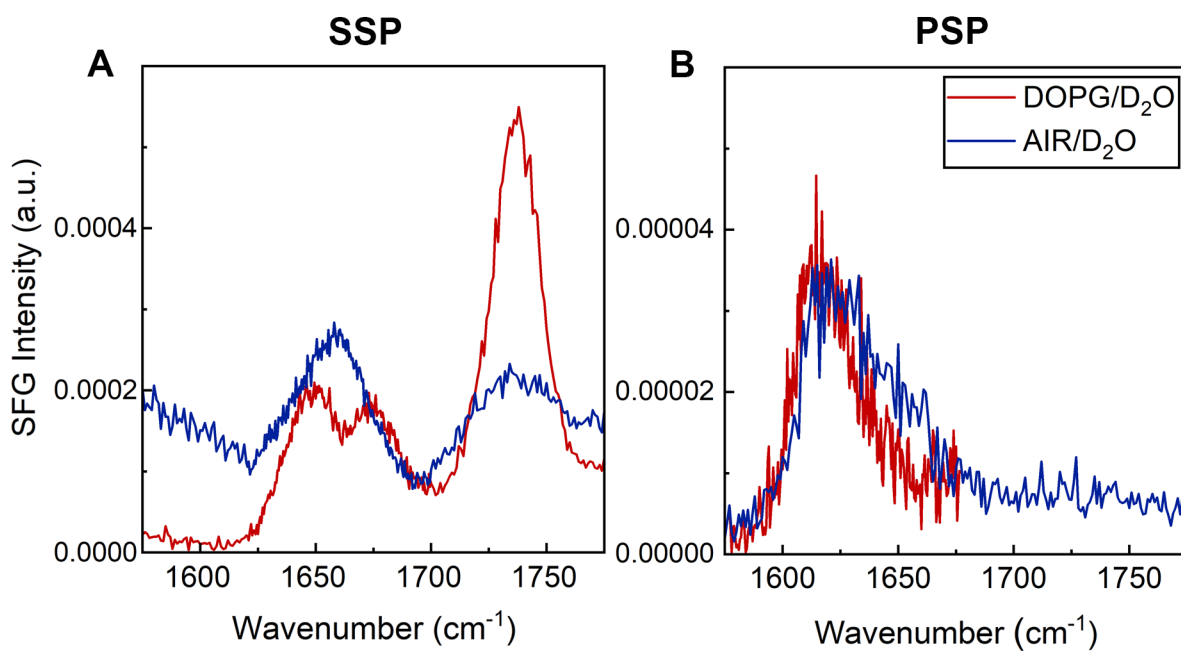

Figure S4: VSFG spectra of 80 h aliquot adsorbed to air/ $\text{D}_2\text{O}$  and DOPG/ $\text{D}_2\text{O}$  interfaces in SSP and PSP polarization combinations.

## VSFG spectra at H<sub>2</sub>O

A solvent has an affect on the spectral shape and band positions in VSFG spectrum as can be seen from Figure S5. VSFG spectra of 3 h aliquot adsorbed at DOPG/D<sub>2</sub>O shows two pronounced peaks, whereas at DOPG/H<sub>2</sub>O those peaks are less separated and also shifted by  $\sim 5\text{ cm}^{-1}$  to higher frequencies. The bending mode of H<sub>2</sub>O contributes to the spectrum at  $\sim 1655\text{ cm}^{-1}$ , thus we chose D<sub>2</sub>O as a solvent in our study.

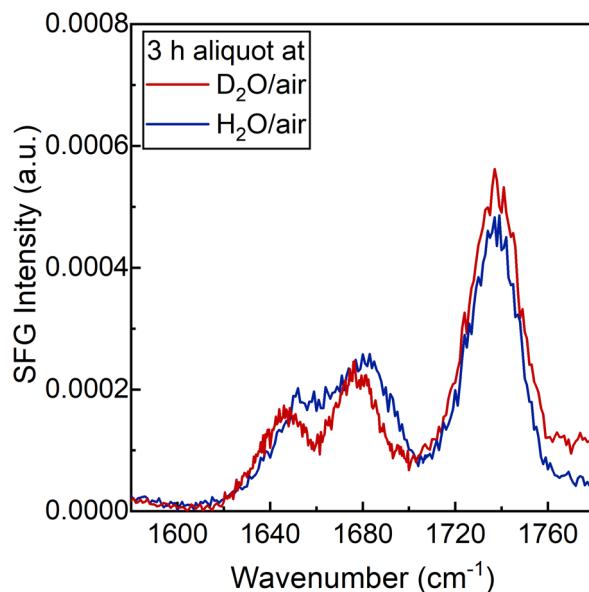

Figure S5: VSFG spectra in SSP polarization combination of 3 h aliquot adsorbed to air/D<sub>2</sub>O and air/H<sub>2</sub>O interfaces.

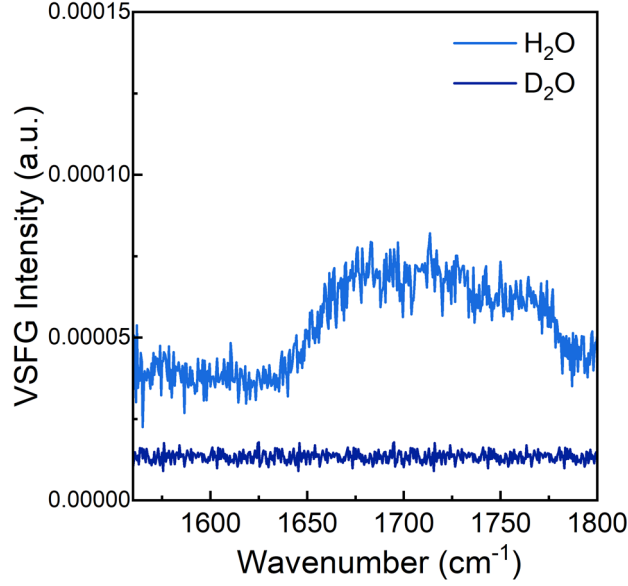

Figure S6: VSFG spectra of air/H<sub>2</sub>O and air/D<sub>2</sub>O interfaces in SSP polarization combination.

## Fitting VSFG spectra

To extract the number of peaks contributing to the spectrum and the exact position of those peaks, the VSFG spectrum was fitted according to the formula:

$$I_{\text{VSFG}} \propto \left| \chi_{\text{NR}}^{(2)} + \chi_{\text{R}}^{(2)} \right|^2 = \left| A_{\text{NR}} e^{i\varphi_{\text{NR}}} + \sum_q \frac{A_q}{\omega_{\text{IR}} - \omega_q + i\Gamma_q} \right|^2 \quad (1)$$

where  $\chi_{\text{NR}}^{(2)}$  is a non-resonant second order non-linear susceptibility and  $\chi_{\text{R}}^{(2)}$  is the effective resonant second order non-linear susceptibility.  $A_{\text{NR}}$  and  $\varphi_{\text{NR}}$  are the non-resonant amplitude and phase.  $A_q$ ,  $\omega_q$  and  $\Gamma_q$  are the amplitude, the center frequency and the width of the  $q$ -th resonance, respectively.



Table S2: Parameters obtained from fitting VSFG spectra of lysozyme 80 h aliquot adsorbed to air/D<sub>2</sub>O.

|                          |                             |                 |                             |
|--------------------------|-----------------------------|-----------------|-----------------------------|
| $\chi_{\text{NR}}^{(2)}$ | $\varphi_{\text{NR}}$       | $A_{\text{NR}}$ |                             |
|                          | 2.83                        | 0.4             |                             |
| $\chi_{\text{R}}^{(2)}$  | $\omega_q, \text{ cm}^{-1}$ | $A_q$           | $\Gamma_q, \text{ cm}^{-1}$ |
| <b>Peak 1</b>            | 1646                        | 2.15            | 15                          |
| <b>Peak 2</b>            | 1675                        | -2.51           | 17                          |
| <b>Peak 3</b>            | 1720                        | 1.52            | 14                          |
| <b>Peak 4</b>            | 1616                        | -0.59           | 14                          |

Table S3: Parameters obtained from fitting VSFG spectra of lysozyme 80 h aliquot adsorbed to DOPG/D<sub>2</sub>O.

|                          |                             |                 |                             |
|--------------------------|-----------------------------|-----------------|-----------------------------|
| $\chi_{\text{NR}}^{(2)}$ | $\varphi_{\text{NR}}$       | $A_{\text{NR}}$ |                             |
|                          | 2.02                        | 0.17            |                             |
| $\chi_{\text{R}}^{(2)}$  | $\omega_q, \text{ cm}^{-1}$ | $A_q$           | $\Gamma_q, \text{ cm}^{-1}$ |
| <b>Peak 1</b>            | 1650                        | 2.8             | 11                          |
| <b>Peak 2</b>            | 1675                        | 2.4             | 11                          |
| <b>Peak 3</b>            | 1734                        | 6.83            | 13                          |
| <b>Peak 4</b>            | 1618                        | -2.10           | 15                          |

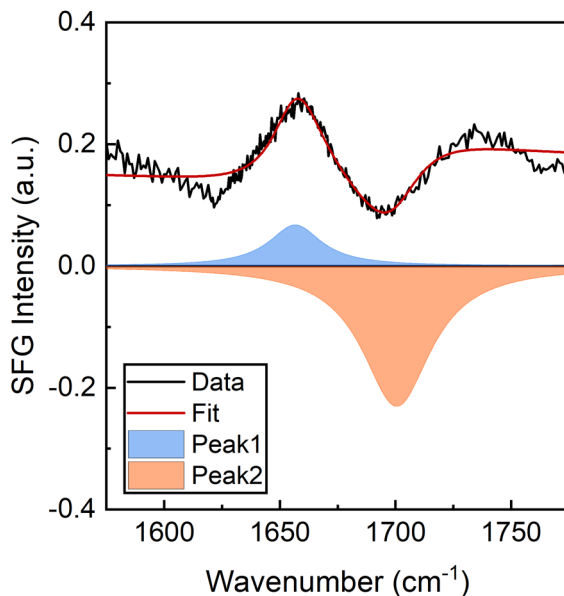

Figure S7: VSFG spectrum of 80 h aliquot adsorbed to air/D<sub>2</sub>O interface (SSP polarization combination) and fitting of the data with only one peak in the Amide I region.

## Packing of DOPG monolayer

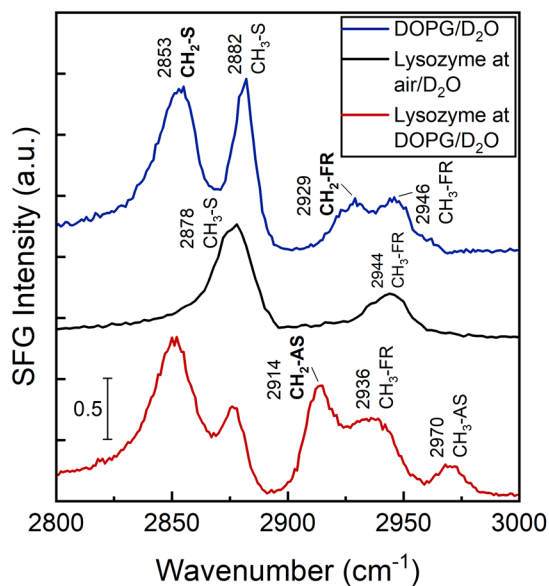

Figure S8: VSFG spectra of DOPG/D<sub>2</sub>O interfaces, and 20 h lysozyme's aliquot adsorbed to air/D<sub>2</sub>O and DOPG/D<sub>2</sub>O, in C-H vibrational region.

Packing of the lipid monolayer can be evaluated from the strength of CH<sub>2</sub> and CH<sub>3</sub> symmetric vibrational modes, the intensity ratio of those two modes are often used to estimate

molecular ordering. It is well known that when the lipid monolayer is ideally packed, only the signal from  $\text{CH}_3$  vibrational modes will be visible in the VSFG spectrum. When monolayer starts to lose its ordering, the intensity of  $\text{CH}_3$  peaks decreases, and vibrational bands of  $\text{CH}_2$  start to appear. In our case, we see intense  $\text{CH}_2$  vibrational bands in the VSFG spectra of DOPG/ $\text{D}_2\text{O}$  interface, which suggests that monolayer is loosely packed. DOPG is unsaturated lipid with two cis-double bonds in its hydrocarbon chains (see Figure 1B in the manuscript for the molecular structure). Unsaturated lipids tend to form loosely packed monolayers due to defects in their hydrocarbon chains that are caused by cis-double bonds. Previous reflection absorption infrared spectroscopy (RAIRS)<sup>S1</sup> and SFG<sup>S2,S3</sup> studies have revealed that monolayers constructed from lipids with unsaturated linkages show higher disorder and fluidity comparing with saturated lipids. After adsorption of 20 h aliquot, the intensity of  $\text{CH}_3\text{-S}$  decreases even further, showing that monolayer got even less ordered.

In Figure S9 we show DOPG isotherm from which it is evident that 30 mN/m surface pressure of DOPG monolayer corresponds to liquid condensed phase. Our measured isotherm is consistent with isotherms presented in the literature.<sup>S4,S5</sup>

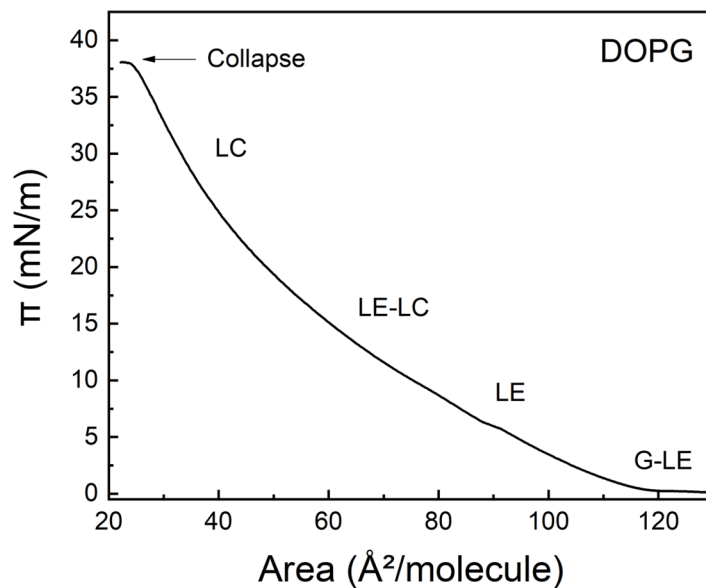

Figure S9: Surface pressure ( $\pi$ ) - mean molecular area (Å) isotherm of DOPG. G-LE stands for gas phase and liquid-expanded phase coexistence, LE: liquid-expanded phase, LC: liquid-condensed phase, LE-LC: coexistence of LE and LC phases. The phase transitions are shown only as a guideline.

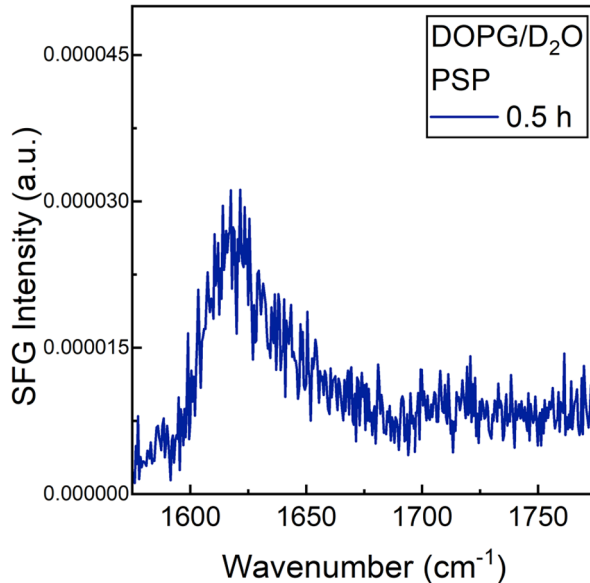

Figure S10: VSFG spectrum of 0.5 h aliquot adsorbed to DOPG/D<sub>2</sub>O interface in PSP polarization combination in the 1560 - 1760 cm<sup>-1</sup> region. No signal above 1700 cm<sup>-1</sup> shows that there is no polarization leakage.

## References

- (S1) Budvytyte, R.; Valincius, G.; Niaura, G.; Voiciuk, V.; Mickevicius, M.; Chapman, H.; Goh, H.-Z.; Shekhar, P.; Heinrich, F.; Shenoy, S.; Lösche, M.; Vanderah, D. J. Structure and Properties of Tethered Bilayer Lipid Membranes with Unsaturated Anchor Molecules. *Langmuir* **2013**, *29*, 8645–8656.
- (S2) Anderson, N. A.; Richter, L. J.; Stephenson, J. C.; Briggman, K. A. Characterization and Control of Lipid Layer Fluidity in Hybrid Bilayer Membranes. *J. Am. Chem. Soc.* **2007**, *129*, 2094–2100.
- (S3) Okur, H. I.; Chen, Y.; Smolentsev, N.; Zdrali, E.; Roke, S. Interfacial Structure and Hydration of 3D Lipid Monolayers in Aqueous Solution. *J. Phys. Chem. B* **2017**, *121*, 2808–2813.
- (S4) Prince, A.; Tiwari, A.; Mandal, T.; Sharma, K.; Kanik, N.; Sinha, D. K.; Saleem, M. Interplay of bacterial membrane vesicle and host lipid physicochemical parameters during host-bacterial membrane vesicle interaction. *bioRxiv* **2019**,
- (S5) Broniatowski, M.; Flasiński, M.; Zięba, K.; Miśkowiec, P. Langmuir monolayer studies of the interaction of monoamphiphilic pentacyclic triterpenes with anionic mitochondrial and bacterial membrane phospholipids – Searching for the most active terpene. *BBA - Biomembranes* **2014**, *1838*, 2460–2472.
